# Supplementary material for: Characterization of Hspb8 in Zebrafish
Source: MDPI journal article supplement (doi:10.3390/cells9061562), 2020-06-26
Supplement: s1 [file s1]

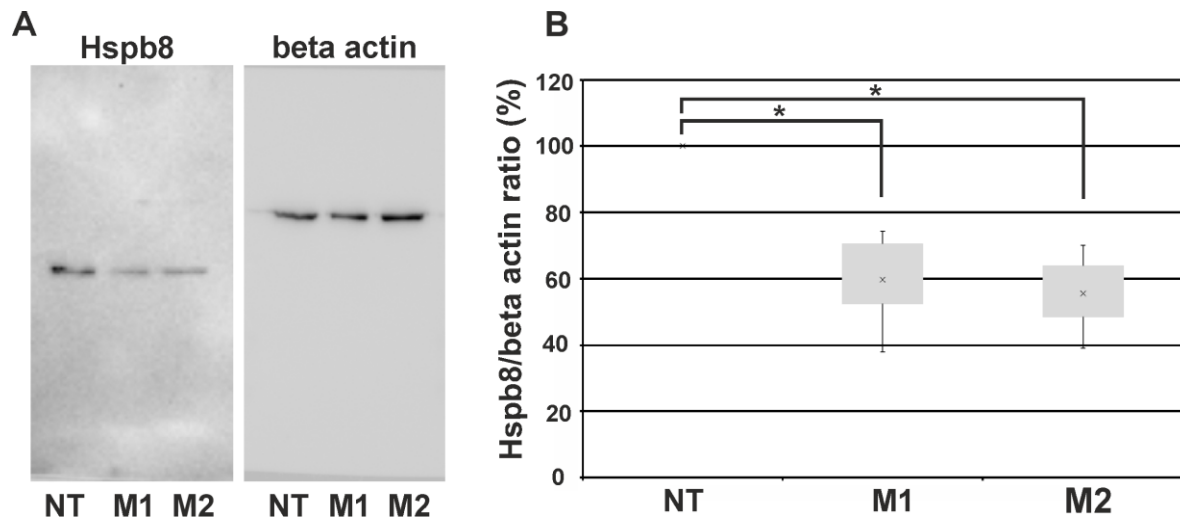

**Figure S1.** Control of morpholino-mediated *hspb8* knockdown effectiveness in 72 hpf zebrafish embryos. (A) The representative Western blot analysis of Hspb8 level, with  $\beta$ -actin used as a loading control. (B) The graph summarizes the Hspb8/ $\beta$ -actin ratio. The Hspb8 quantity in the non-treated (NT) group was taken as 100%. The experiment was performed 3 times,  $n = 10$ . Asterisks (\*) indicate significant differences,  $p > 0.05$ . Error bars show the standard deviation. NT – non-treated embryos, M1, and M2 – morphant groups.

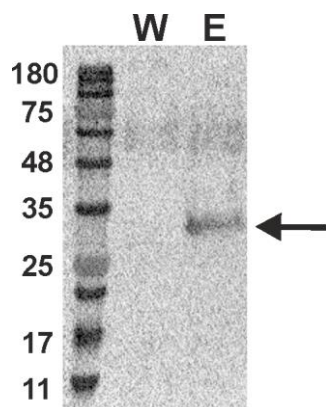

**Figure S2:** Control of the specificity of a commercially available monoclonal antibody raised against human Hspb8 used in this study for the detection of zebrafish Hspb8
